# Supplementary material for: Incorporating Two Crown Ether Struts into the Backbone of Robust Zirconium‐Based Metal–Organic Frameworks as Custom‐Designed Efficient Collectors for Radioactive Metal Ions
Source: PubMed Central journal article supplement (PMC11005732; doi:10.1002/advs.202308663), 2024-02-04
Supplement: ADVS-11-2308663-s001.pdf [file ADVS-11-2308663-s001.pdf]

## Supporting Information

for *Adv. Sci.*, DOI 10.1002/adv.202308663

Incorporating Two Crown Ether Struts into the Backbone of Robust Zirconium-Based Metal–Organic Frameworks as Custom-Designed Efficient Collectors for Radioactive Metal Ions

*Lei Li, Kang Kang, Tien-Shee Chee, Zhenjiang Tian, Qi Sun and Chengliang Xiao\**

## Supporting Information

### **Incorporating Two Crown Ether Struts into the Backbone of Robust Zirconium-based Metal-Organic Frameworks as Custom-Designed Efficient Collectors for Radioactive Metal Ions**

*Lei Li, Kang Kang, Tien-Shee Chee, Zhenjiang Tian, Qi Sun, and Chengliang Xiao\**

#### **Materials and instrumentation**

All starting materials were purchased from commercial companies and used without further purification. Powder X-ray diffraction (PXRD) patterns were recorded on a Rigaku Ultima IV diffractometer equipped with Cu K $\alpha$  radiation from 3° to 60° with a step of 0.02°. The porous properties of the samples were measured by N<sub>2</sub> physisorption at 77 K on an automated specific surface area and micropore analyzer (AUTOSORB-IQ2-MP). TG analysis was performed in a nitrogen atmosphere with a rate of 10 °C min<sup>-1</sup> using a TA Instruments SDT Q600. X-ray photoelectron spectroscopy (XPS) spectra were acquired on a Thermo Scientific ESCALAB 250Xi. FT-IR spectra were obtained on a Nicolet 6700 spectrometer in KBr pellets in the wavelength range of 4000 – 400 cm<sup>-1</sup>. EDS images were acquired on a Scanning Electron Microscopy with an Energy Dispersive X-ray Spectrometer (SEM-EDS, Hitachi SU8010). The concentrations of Sr<sup>2+</sup> and Cs<sup>+</sup> in solutions were analyzed by an ICP-MS (Agilent Technologies 7800). The Single-crystal X-ray diffraction data collection of ZJU-X100, Sr<sup>2+</sup>⊂ZJU-X100 and Cs<sup>+</sup>⊂ZJU-X102 were recorded on a Bruker D8-Venture diffractometer with a Turbo X-ray Source (Cu-K $\alpha$  radiation). The Single-crystal X-ray diffraction data collection of ZJU-X102 was recorded on a Bruker D8-Venture diffractometer with an X-ray Source (Ga-K $\alpha$  radiation). The data frames were collected using the program APEX 3 and processed using the program SAINT routine in APEX 3. The crystal structures were refined by the full-matrix least-squares on  $F^2$  using the SHELXTL-2018 program.

#### **Experimental section**

##### **Synthesis of Linkers.**

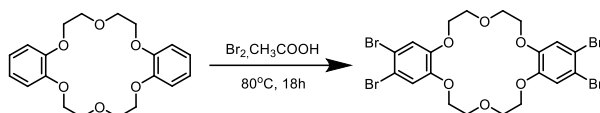

**4,4',5,5'-tetrabromodibenzo-18-crown-6.** Dibenzo 18-crown-6 (12.50 g, 27.7 mmol) was dissolved in acetic acid (230 ml). Bromine (13.30 ml, 260.4 mmol) was added to the solution, and the mixture was stirred for 18 h at 80 °C. After cooling the solution, the orange powder was filtered and washed with MeOH and water to give white residue (19.25 g, 82.12%). <sup>1</sup>H NMR (500 MHz, CDCl<sub>3</sub>, 298 K):  $\delta$  = 7.03 (s, 4 H), 4.10 (t, 8 H), 3.96 (t, 8 H).

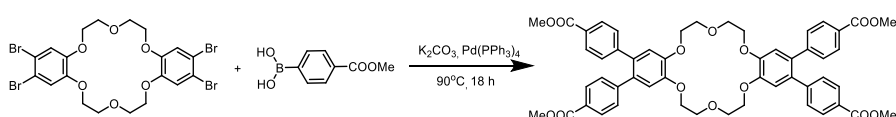

**4,4',5,5'-tetrabenzoate dibenzo-18-crown-6.** 4,4',5,5'-tetrabromodibenzo-18-crown-6 (11.30 g, 16.71 mmol), 4-methoxycarbonylphenylboronic acid (18.06 g, 100.35 mmol), K<sub>2</sub>CO<sub>3</sub> (23.1 g, 167.3 mmol), and tetrakis(triphenylphosphine) palladium (1.35 g, 1.17 mmol) were added into a 1 L Schleck flask. The flask was pumped under vacuum and refilled with Ar gas three times, and then the degassed solvent of 1,4-dioxane/CH<sub>3</sub>OH (540 mL/180 mL) were transferred into the Schleck flask. The mixture solution was heated at 90 °C for 18 h under an Ar atmosphere. After that the reaction mixture was cooled to room temperature. It was concentrated by a rotary evaporator and washed by saturated NaCl solution. Finally, the crude product was recrystallized with ethyl acetate and CH<sub>2</sub>Cl<sub>2</sub> to obtain a white solid. Yield: 9.18 g (61.24 %). <sup>1</sup>H NMR (500 MHz, CDCl<sub>3</sub>, 298 K):  $\delta$  = 7.87 (d, 8 H), 7.14 (d, 8 H), 6.94 (s, 4 H), 4.26 (t, 8 H), 4.08 (t, 8 H), 3.89 (s, 12 H).

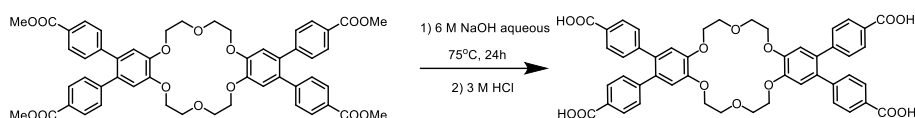

**4,4',5,5'-terabenzoic acid dibenzo-18-crown-6.** 4,4',5,5'-tetrabenzoate dibenzo-18-crown-6 (14.7 g, 0.966 mmol) was dissolved in 550 mL of CH<sub>3</sub>OH, and 183 mL of 6 M NaOH aqueous solution was added. The mixture was stirred under 75 °C for 24 h. After cooling to room temperature, it was concentrated under vacuo to remove methanol. 3 M HCl was added to the above solution and adjusted to pH = 1. white precipitate was obtained by centrifugation and washed with water and dried in vacuum oven at 70 °C for 12 h. Yield: 11.58 g (84.03%). <sup>1</sup>H NMR (500 MHz, DMSO-d<sub>6</sub>, 298 K):  $\delta$  = 7.78 (d, 8 H), 7.22 (d, 8 H), 7.03 (s, 4 H), 4.22 (t, 8 H), 3.88 (t, 8 H).

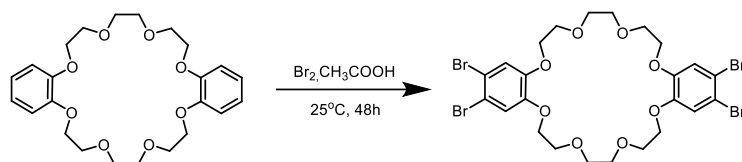

**4,4',5,5'-tetrabromodibenzo-24-crown-8.** Dibenzo 24-crown-8 (9.00 g, 20.07 mmol) was dissolved in acetic acid (120 ml). Bromine (8.1 ml, 153.78 mmol) was added to the solution, and the mixture was stirred for 48 h at 25 °C. After cooling the solution, the orange powder was filtered and washed with MeOH and water to give a white residue (10.68 g, 69.6 %). <sup>1</sup>H NMR (500 MHz, CDCl<sub>3</sub>, 298 K): δ = 7.06 (s, 4 H), 4.10 (t, 8 H), 3.89 (t, 8 H), 3.79 (s, 8 H).

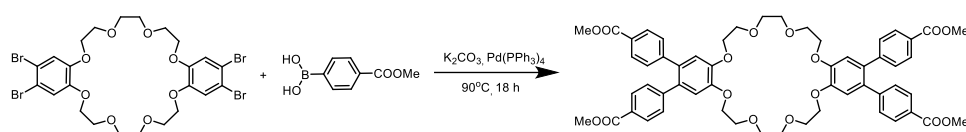

**4,4',5,5'-tetrabenzoate dibenzo-24-crown-8.** 4,4',5,5'-tetrabromodibenzo-24-crown-8 (11.00 g, 14.44 mmol), 4-methoxycarbonylphenylboronic acid (15.46 g, 85.9 mmol), K<sub>2</sub>CO<sub>3</sub> (19.79 g, 143.14 mmol), and tetrakis(triphenylphosphine) palladium (1.15 g, 0.99 mmol) were added into a 1 L Schleck flask. The flask was pumped under vacuum and refilled with Ar gas three times, and then the degassed solvent of 1,4-dioxane/CH<sub>3</sub>OH (540 mL/180 mL) were transferred into the Schleck flask. The mixture solution was heated at 90 °C for 18 h under an Ar atmosphere. After that the reaction mixture was cooled to room temperature. It was concentrated by a rotary evaporator and washed by saturated NaCl solution. Finally, the crude product was recrystallized with ethyl acetate and CH<sub>2</sub>Cl<sub>2</sub> to obtain a white solid. Yield: 8.62 g (60.78 %). <sup>1</sup>H NMR (500 MHz, CDCl<sub>3</sub>, 298 K): δ = 7.86(d,8 H), 7.14 (d, 8 H), 6.94 (s, 4 H), 4.24 (t, 8 H), 3.97 (t, 8 H), 3.89 (s, 12 H).

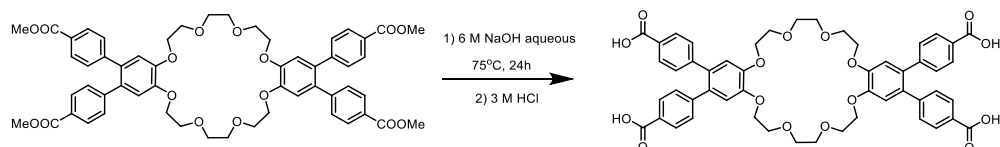

**4,4',5,5'-terabenzoic acid dibenzo-24-crown-8.** 4,4',5,5'-tetrabenzoate dibenzo-24-crown-8 (13.4 g, 0.966 mmol) was dissolved in 460 mL of CH<sub>3</sub>OH, and 153 mL of 6 M NaOH aqueous solution was added. The mixture was stirred under 75 °C for 24 h. After cooling to room temperature, it was concentrated under vacuo to remove methanol. 3 M HCl was added to the above solution and adjusted to pH=1. White precipitate was obtained by centrifugation and washed with water and dried in vacuum oven at 70 °C for 12 h. Yield: 10.68 g (84.56 %). <sup>1</sup>H

NMR (500 MHz, DMSO- $d_6$ , 298 K):  $\delta$  = 7.78 (d, 8 H), 7.21 (d, 8 H), 7.04 (s, 4 H), 4.21 (t, 8 H), 3.81 (t, 8 H), 3.71 (s, 8 H).

**Synthesis of ZJU-X100.** The ligand of L1(4,4',5,5'-terabenzic acid dibenzo-18-crown-6) (10 mg, 0.0119 mmol) and  $ZrOCl_2 \cdot 8H_2O$  (11.5 mg, 0.0356 mmol) were added in 6 mL of DMF/formic acid (v/v, 4/2) solution. The mixture was placed into a Teflon-lined stainless-steel autoclave and heated at 120 °C for 48 h. After cooling to room temperature, the crystals were isolated by filtration, then washed with DMF, EtOH and dried at 50 °C for 12 h (Yield: 53% based on L1). The crystal data of ZJU-X100 is presented in **Table S2**.

**Synthesis of ZJU-X102.** The ligand of L2(4,4',5,5'-terabenzic acid dibenzo-24-crown-8) (45 mg, 0.0484 mmol),  $ZrOCl_2 \cdot 8H_2O$  (17.5 mg, 0.0543 mmol) and 80  $\mu$ L TFA were added in 6 mL of DMF/formic acid (v/v, 4/2) solution. The mixture was placed into a Teflon-lined stainless-steel autoclave and heated at 120 °C for 72 h. After cooling to room temperature, the crystals were isolated by filtration, then washed with DMF, EtOH and dried at 50 °C for 12 h (Yield: 62% based on L2). The crystal data of ZJU-X102 is presented in **Table S3**.

**Synthesis of  $Sr^{2+} \subset ZJU-X100$ .** The synthesized ZJU-X100 was immersed in the  $SrCl_2$  saturated solution. The solution was replenished more than 5 times for 1 day. The crystal data of  $Sr^{2+} \subset ZJU-X100$  is presented in **Table S4**.

**Synthesis of  $Cs^+ \subset ZJU-X102$ .** The synthesized ZJU-X102 was immersed in the CsCl saturated solution. The solution was replenished more than 5 times for 1 day. The crystal data of  $Cs^+ \subset ZJU-X102$  is presented in **Table S5**.

## Materials characterization

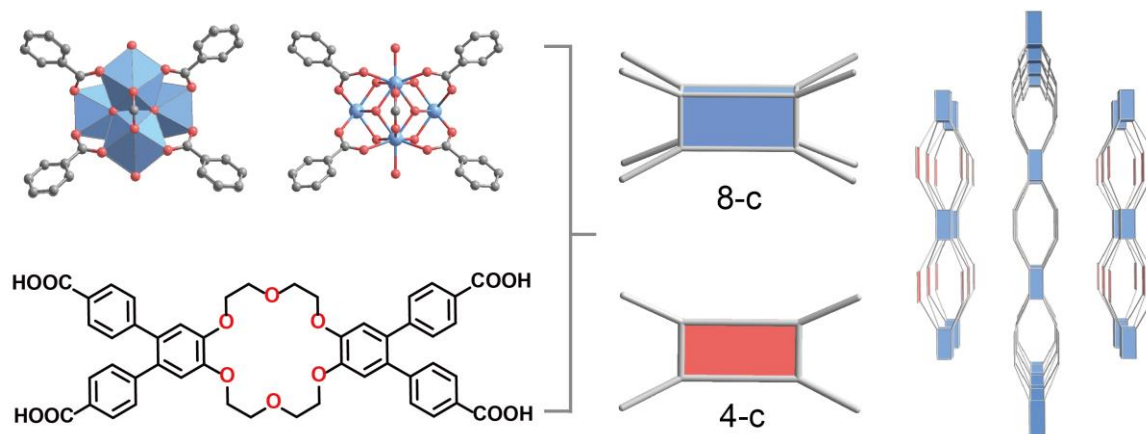

**Figure S1.** 8-connected Zr nodes,  $\text{Zr}_6\text{O}_4(\mu_3\text{-OH})_4(\mu_1\text{-OH})_2(\text{HCOO})_2(\text{H}_2\text{O})_2$  and L1 used in ZJU-X100 (L1 = 4,4',5,5'-terabenzic acid dibenzo-18-crown-6) construct the topology of  $\{4^{20}.6^8\}\{4^6\}_2$ . Atom colors: Zr, ocean blue; O, red; C, light grey. Hydrogen atoms were omitted for clarity. Atom colors: Zr, ocean blue; O, red; C, light grey. Hydrogen atoms were omitted for clarity.

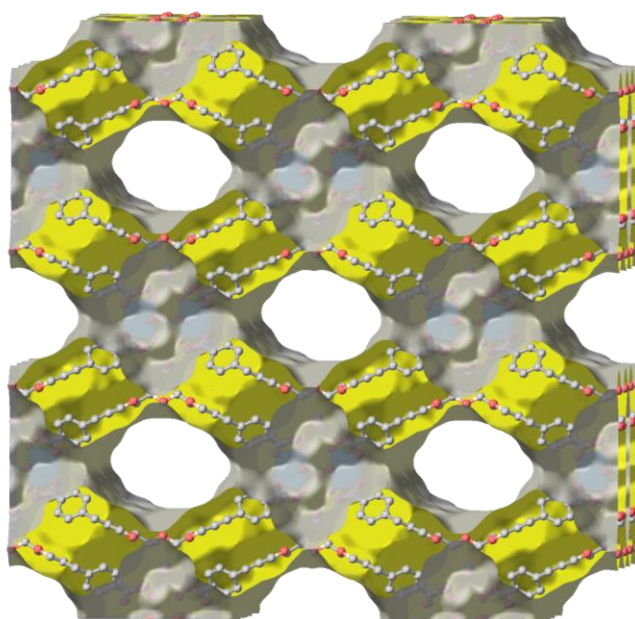

**Figure S2.** The estimated solvent-accessible void volume of ZJU-X100. Atom colors: Zr, ocean blue; O, red; C, light grey. Hydrogen atoms were omitted for clarity.

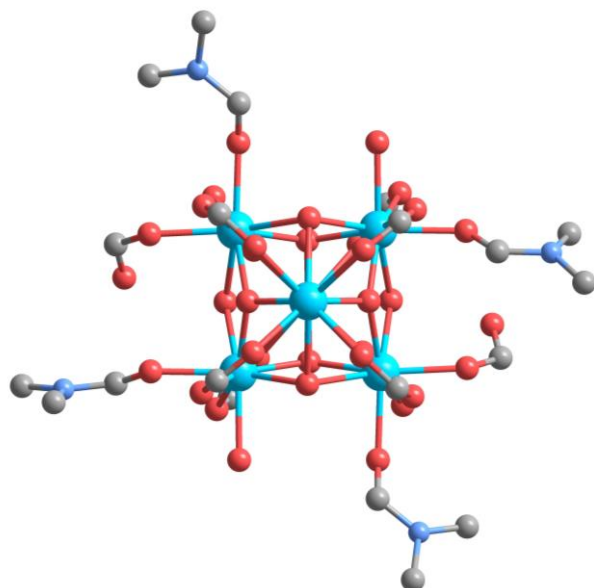

**Figure S3.** Coordination mode of  $Zr_6$  node in ZJU-X102. Atom colors: Zr, ocean blue; O, red; C, light grey. Hydrogen atoms were omitted for clarity.

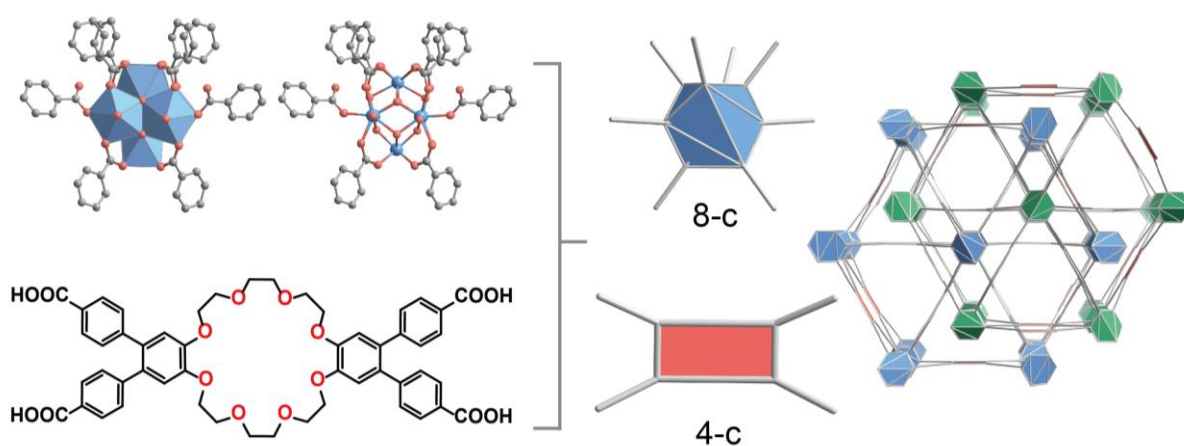

**Figure S4.** 8-connected Zr nodes,  $Zr_6O_4(\mu_3\text{-OH})_4(\mu_1\text{-OH})(\text{HCOO})_2(\text{H}_2\text{O})$  and L2 used in ZJU-X102 (L2 = 4,4',5,5'-terabenzic acid dibenzo-24-crown-8) construct the topology of  $\{4^{14}.6^{11}.8^3\}\{4^3.6^3\}_2$ . Atom colors: Zr, ocean blue; O, red; C, light grey. Hydrogen atoms were omitted for clarity.

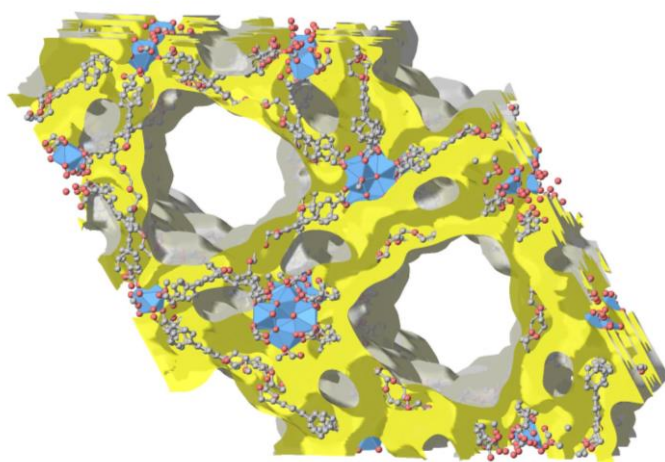

**Figure S5.** The estimated solvent-accessible void volume of ZJU-X102. Atom colors: Zr, ocean blue; O, red; C, light grey. Hydrogen atoms were omitted for clarity.

**Hydrolytic and Solvent Stability Measurements.** ZJU-X100 and ZJU-X102 were soaked in NaOH or HCl solution in the pH range from 0 to 11 for 12 h at room temperature. ZJU-X100 were soaked in 12 M HCl solution and solvents with different polarity (MeOH, Acetone, Cyclohexane, DMF, CH<sub>3</sub>CN). The samples were collected and dried for powder X-ray diffraction measurements.

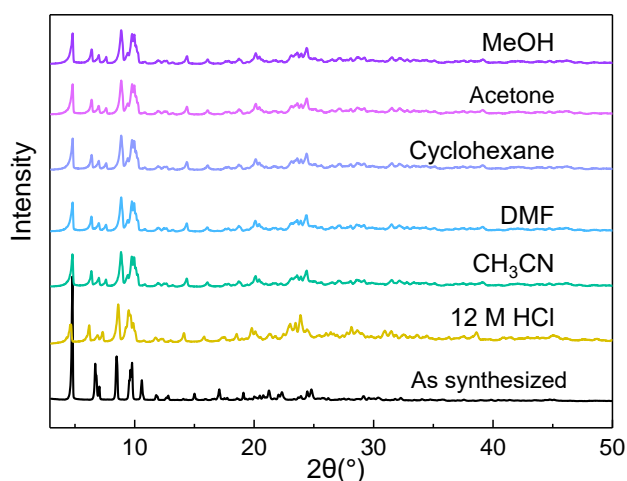

**Figure S6.** Powder X-ray diffraction patterns of ZJU-100 after exposure in different solution.



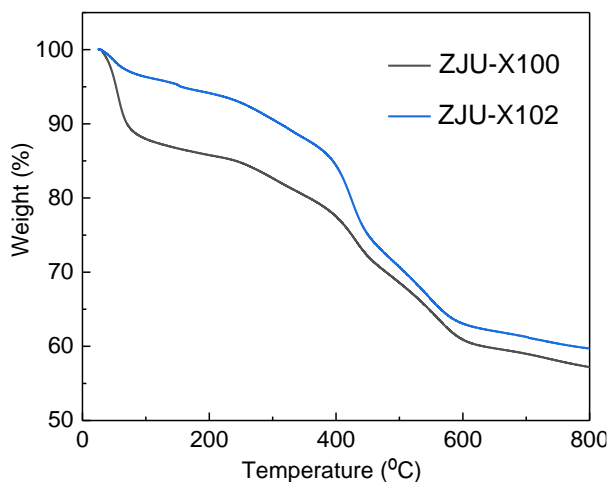

**Figure S7.** TG curves of ZJU-X100 and ZJU-102.

### Sr<sup>2+</sup> and Cs<sup>+</sup> extraction experiments

**Sorption Kinetics Experiments.** The sorption kinetics experiments were carried by dispersing ZJU-X100 and ZJU-X102 into Sr<sup>2+</sup> and Cs<sup>+</sup> solution with a solid-liquid ratio of 1:1, respectively. The mixture was stirred at room temperature. The supernatant solution was collected by syringe in different time intervals from 1 to 60 min, then filtered by 0.22 μm nylon membrane filters. The filtrates of residual Sr<sup>2+</sup> and Cs<sup>+</sup> were diluted with 5% HNO<sub>3</sub> and the concentrations of Sr<sup>2+</sup> and Cs<sup>+</sup> were determined by ICP-MS. The removal percentages were calculated by the equation as follows:

$$R_e = \frac{(C_0 - C_t)}{C_0} \times 100\% \quad (1)$$

where  $C_0$  (mg/L) is the initial concentration,  $C_t$  (mg/L) is the concentration of Sr<sup>2+</sup> or Cs<sup>+</sup> after stirring at different times.

**Table S1.** The adsorption kinetics of Sr<sup>2+</sup> and Cs<sup>+</sup> by some typical sorbents compared with ZJU-X100 and ZJU-X102.

| Pollutant | Materials | Equilibrium time | Ref |
|-----------|-----------|------------------|-----|
|-----------|-----------|------------------|-----|

|           |                                                                                                                                                  |                  |                  |
|-----------|--------------------------------------------------------------------------------------------------------------------------------------------------|------------------|------------------|
| Strontium | KMS-1                                                                                                                                            | > 2 h            | [1]              |
|           | Go-Hap                                                                                                                                           | 2 h              | [2]              |
|           | Crown@MPPPs                                                                                                                                      | 50 min           | [3]              |
|           | DCH18C6-functionalized resin                                                                                                                     | 1 h              | [4]              |
|           | FJSM-SnS                                                                                                                                         | 60 min           | [5]              |
|           | FJSM-InMOF                                                                                                                                       | 2040 min         | [6]              |
|           | SNU-200                                                                                                                                          | 360 min          | [7]              |
|           | MOF-18Cr6                                                                                                                                        | 60 min           | [8]              |
|           | SZ-7                                                                                                                                             | 5 min            | [9]              |
|           | <b>ZJU-X100</b>                                                                                                                                  | <b>1 min</b>     | <b>This work</b> |
| Cesium    | KMS-1                                                                                                                                            | 5 min<br>(65 °C) | [1]              |
|           | KMS-2                                                                                                                                            | 10-15 h          | [10]             |
|           | FJSM-SnS                                                                                                                                         | 30 min           | [5]              |
|           | K-MPS-1                                                                                                                                          | 15 min           | [11]             |
|           | NaFeTiO                                                                                                                                          | 200 min          | [12]             |
|           | Nd-BTC                                                                                                                                           | 30 min           | [13]             |
|           | [(CH <sub>3</sub> ) <sub>2</sub> NH <sub>2</sub> ][UO <sub>2</sub> (L <sub>2</sub> )]·0.5DMF·15H <sub>2</sub> O                                  | 20 min           | [14]             |
|           | [(CH <sub>3</sub> ) <sub>2</sub> NH <sub>2</sub> ] <sub>4</sub> [(UO <sub>2</sub> ) <sub>4</sub> (TBAPy) <sub>3</sub> ]·22DMF·37H <sub>2</sub> O | 20 min           | [15]             |
|           | AMP-PAN                                                                                                                                          | 35 min           | [16]             |
|           | <b>ZJU-X102</b>                                                                                                                                  | <b>1 min</b>     | <b>This work</b> |

**Sorption Isotherm Experiments.** The sorption isotherm experiments were measured by exposing ZJU-X100 and ZJU-X102 into different concentrations of Sr<sup>2+</sup> and Cs<sup>+</sup> solution with a solid-liquid ratio of 1:1. The samples were stirred for 12 h at room temperature and filtered by 0.22 μm nylon membrane filters. The concentrations of residual Sr<sup>2+</sup> and Cs<sup>+</sup> in aqueous solution were determined by ICP-MS. The sorption capacity of ZJU-X100 and ZJU-X102 toward Sr<sup>2+</sup> or Cs<sup>+</sup> were calculated by the following equation:

$$q_e = \frac{(C_0 - C_e)}{m} V \quad (2)$$

Where  $C_0$  (mg/L) is the initial concentration,  $C_e$  (mg/L) is the equilibrium concentration,  $m$  (g) is the mass of sorbent, and  $V$  (L) is the volume of the solution.

Langmuir and Freundlich sorption models were used to fit the sorption isotherms. The Langmuir isotherm model is expressed as given below:

$$\frac{C_e}{q_e} = \frac{1}{q_m K_L} + \frac{C_e}{q_m} \quad (3)$$

where  $q_e$  (mg/g) is the sorption capacity at equilibrium,  $q_m$  (mg/g) is the maximum sorption capacity and  $K_L$  is the Langmuir constant,  $C_e$  (mg/L) is the equilibrium concentration of  $\text{Sr}^{2+}$  and  $\text{Cs}^+$ . The Freundlich isotherm model is shown as follows:

$$\ln q_e = \ln K_F + \frac{1}{n} \ln C_e \quad (4)$$

where  $K_F$  is a constant about sorption capacity and  $n$  is related to the intensity of sorption.

**Sorption Selectivity Experiments.** Selectivity experiments of ZJU-X100 and ZJU-X102 toward  $\text{Sr}^{2+}$  and  $\text{Cs}^+$  were performed by adding ZJU-X100 and ZJU-X102 into 10 ppm of  $\text{Sr}^{2+}$  and  $\text{Cs}^+$  solution containing corresponding proportions of competing anions with a solid-liquid ratio of 1:1, respectively. The solution was stirred for 12 h at room temperature. The samples were filtered and the concentrations of residual  $\text{Sr}^{2+}$  and  $\text{Cs}^+$  were analyzed by ICP-MS, respectively.

### Sorption Mechanism

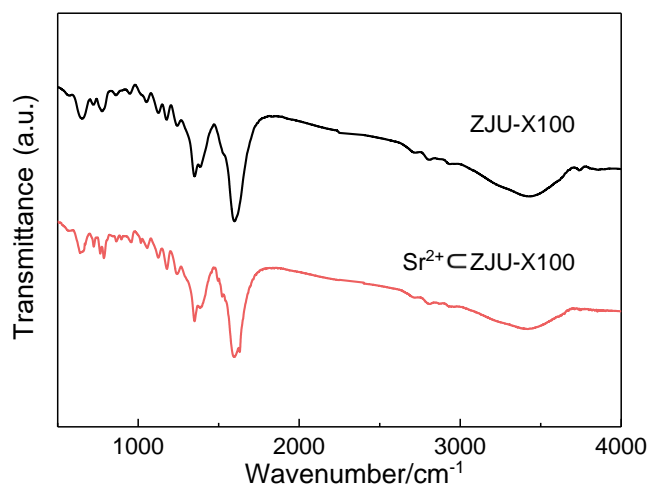

**Figure S8.** FT-IR spectra of ZJU-100 and Sr<sup>2+</sup>@ZJU-100.

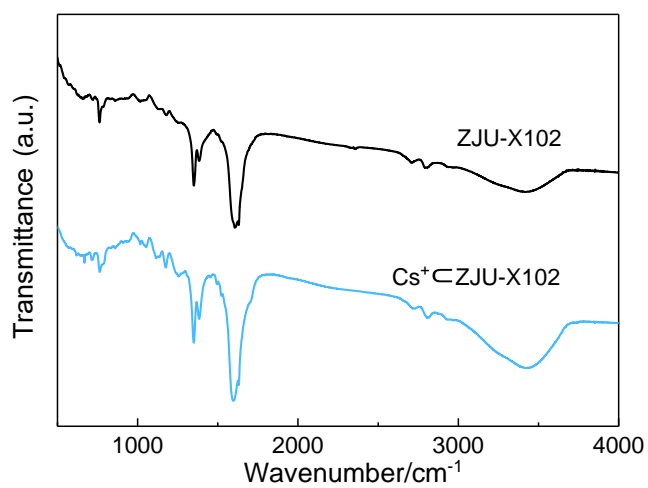

**Figure S9.** FT-IR spectra of ZJU-102 and Sr<sup>2+</sup>@ZJU-102.

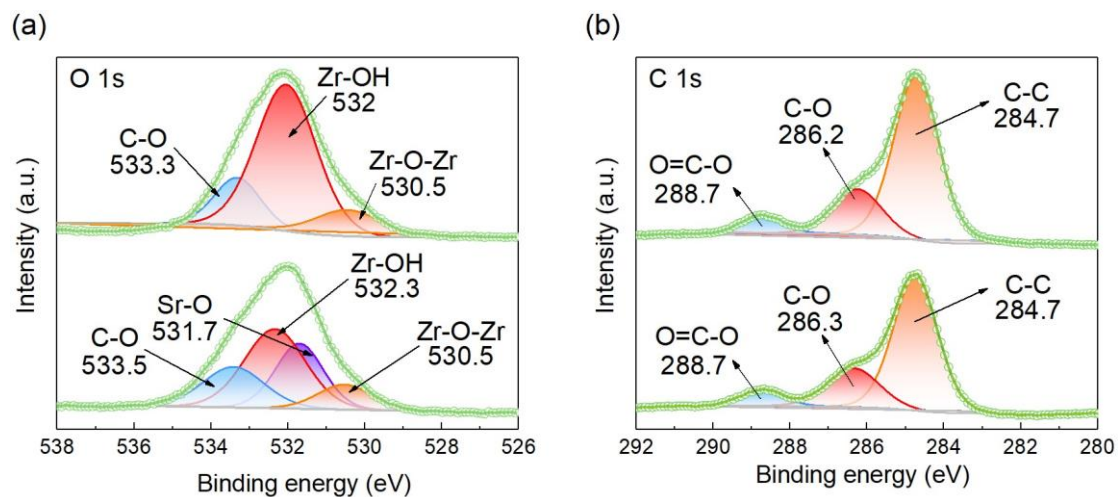

**Figure S10.** High-resolution a) O 1s and b) C 1s spectra of ZJU-X100 before and after  $\text{Sr}^{2+}$  adsorption.

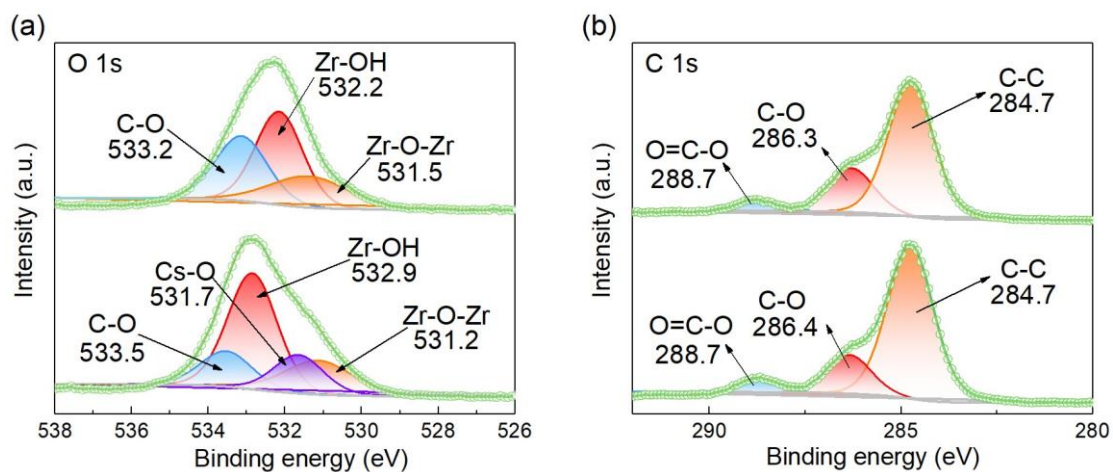

**Figure S11.** High-resolution a) O 1s and b) C 1s spectra of ZJU-X102 before and after  $\text{Cs}^+$  adsorption.

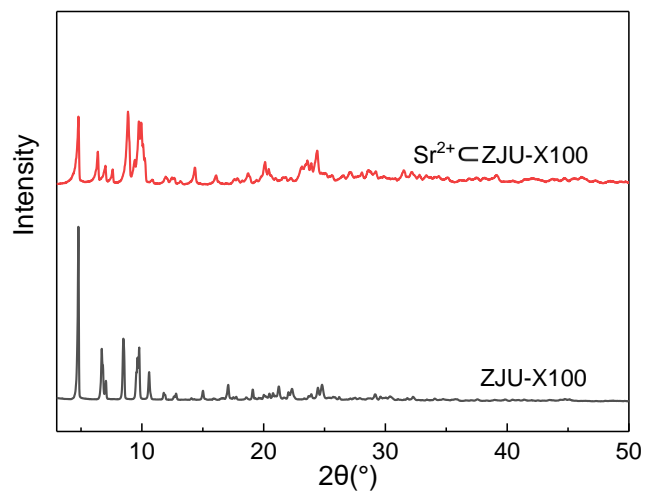

**Figure S12.** Powder X-ray diffraction patterns of ZJU-100 and  $\text{Sr}^{2+}\text{CZJU-100}$ .

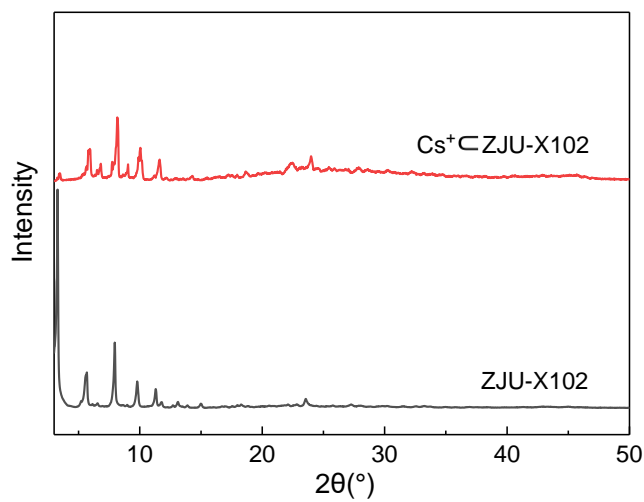

**Figure S13.** Powder X-ray diffraction patterns of ZJU-102 and  $\text{Cs}^{+}\text{CZJU-102}$ .

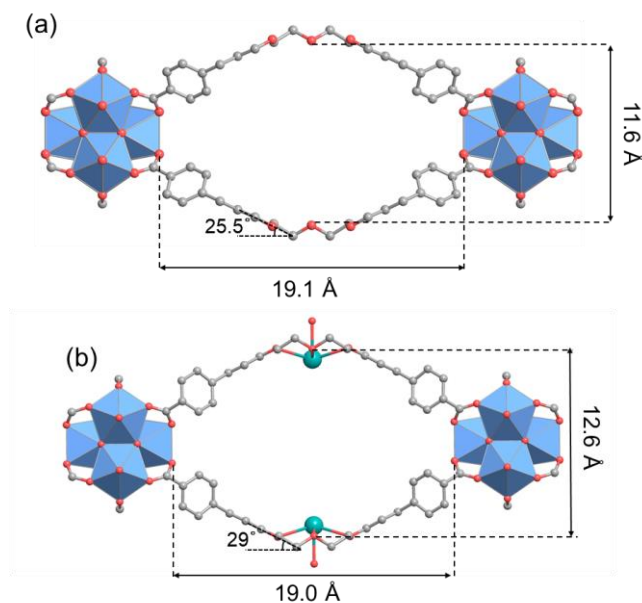

**Figure S14.** Change of diamond holes of ZJU-X100 a) before and b) after adsorbing Sr<sup>2+</sup>. Atom colors: Zr, ocean blue; Sr, green; O, red; C, light grey. Hydrogen atoms were omitted for clarity.

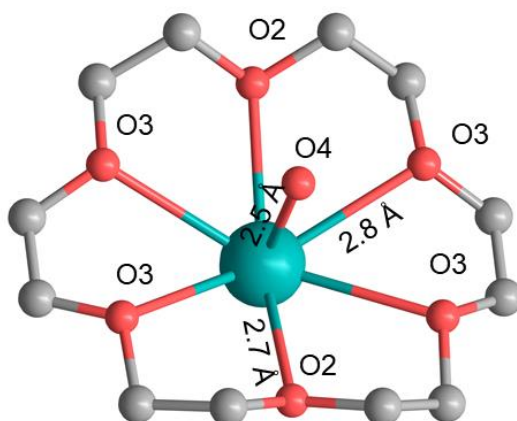

**Figure S15.** Coordination environment and bond length information of Sr<sup>2+</sup> in 18-crown-6 group of ZJU-X100. Atom colors: Zr, ocean blue; Sr, green; O, red; C, light grey. Hydrogen atoms were omitted for clarity.

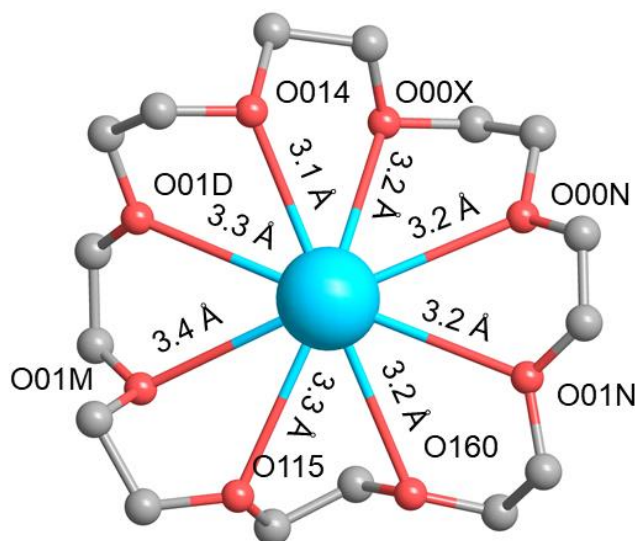

**Figure S16.** Coordination environment and bond length information of Cs<sup>+</sup> in 24-crown-8 group of ZJU-X102. Atom colors: Zr, ocean blue; Cs, sky blue; O, red; C, light grey. Hydrogen atoms were omitted for clarity.

**Table S2.** Crystallographic Data and Structure Refinement Parameters of ZJU-X100.

|                                            |                                                                 |
|--------------------------------------------|-----------------------------------------------------------------|
| CCDC                                       | 2301729                                                         |
| empirical formula                          | C <sub>98</sub> H <sub>66</sub> O <sub>44</sub> Zr <sub>6</sub> |
| temperature/K                              | 200.15                                                          |
| fw/(g/mol)                                 | 2428.30                                                         |
| cryst syst                                 | orthorhombic                                                    |
| space group                                | <i>Cmmm</i>                                                     |
| <i>a</i> /Å                                | 26.3044(8)                                                      |
| <i>b</i> /Å                                | 25.7724(12)                                                     |
| <i>c</i> /Å                                | 12.6394(5)                                                      |
| $\alpha$ /deg                              | 90                                                              |
| $\beta$ /deg                               | 90                                                              |
| $\gamma$ /deg                              | 90                                                              |
| volume/Å <sup>3</sup>                      | 8568.6(6)                                                       |
| <i>Z</i>                                   | 2                                                               |
| $\rho_{\text{calc}}$ /(g/cm <sup>3</sup> ) | 0.941                                                           |



|                         |        |
|-------------------------|--------|
| $\mu/\text{mm}^{-1}$    | 3.361  |
| reflns collected        | 55082  |
| indep reflns            | 4205   |
| GOF on $F^2$            | 1.027  |
| $R_1 [I > 2\sigma(I)]$  | 0.0788 |
| $wR_2 [I > 2\sigma(I)]$ | 0.2086 |

**Table S3.** Crystallographic Data and Structure Refinement Parameters of ZJU-X102.

|                                             |                                                                  |
|---------------------------------------------|------------------------------------------------------------------|
| CCDC                                        | 2299622                                                          |
| empirical formula                           | $\text{C}_{122}\text{H}_{138}\text{N}_6\text{O}_{50}\text{Zr}_6$ |
| temperature/K                               | 193.00                                                           |
| fw/(g/mol)                                  | 3035.70                                                          |
| cryst syst                                  | trigonal                                                         |
| space group                                 | $R\bar{3}c$                                                      |
| $a/\text{\AA}$                              | 54.932(3)                                                        |
| $b/\text{\AA}$                              | 54.932(3)                                                        |
| $c/\text{\AA}$                              | 37.744(3)                                                        |
| $\alpha/\text{deg}$                         | 90                                                               |
| $\beta/\text{deg}$                          | 90                                                               |
| $\gamma/\text{deg}$                         | 120                                                              |
| volume/ $\text{\AA}^3$                      | 98636(14)                                                        |
| $Z$                                         | 18                                                               |
| $\rho_{\text{calc}}/(\text{g}/\text{cm}^3)$ | 0.920                                                            |
| $\mu/\text{mm}^{-1}$                        | 1.815                                                            |
| reflns collected                            | 345916                                                           |
| indep reflns                                | 22495                                                            |
| GOF on $F^2$                                | 1.061                                                            |
| $R_1 [I > 2\sigma(I)]$                      | 0.0745                                                           |
| $wR_2 [I > 2\sigma(I)]$                     | 0.2441                                                           |

**Table S4.** Crystallographic Data and Structure Refinement Parameters of Sr<sup>2+</sup>cZJU-X100.

|                                                     |                                                                                   |
|-----------------------------------------------------|-----------------------------------------------------------------------------------|
| CCDC                                                | 2299617                                                                           |
| empirical formula                                   | C <sub>97</sub> H <sub>75.2</sub> O <sub>46</sub> Sr <sub>2</sub> Zr <sub>6</sub> |
| temperature/K                                       | 301.15                                                                            |
| fw/(g/mol)                                          | 2699.33                                                                           |
| cryst syst                                          | orthorhombic                                                                      |
| space group                                         | <i>Cmmm</i>                                                                       |
| <i>a</i> /Å                                         | 27.638(6)                                                                         |
| <i>b</i> /Å                                         | 26.210(3)                                                                         |
| <i>c</i> /Å                                         | 11.8556(18)                                                                       |
| <i>α</i> /deg                                       | 90                                                                                |
| <i>β</i> /deg                                       | 90                                                                                |
| <i>γ</i> /deg                                       | 90                                                                                |
| volume/Å <sup>3</sup>                               | 8588(2)                                                                           |
| <i>Z</i>                                            | 2                                                                                 |
| $\rho_{\text{calc}}$ /(g/cm <sup>3</sup> )          | 1.044                                                                             |
| $\mu$ /mm <sup>-1</sup>                             | 4.135                                                                             |
| reflns collected                                    | 19009                                                                             |
| indep reflns                                        | 4156                                                                              |
| GOF on <i>F</i> <sup>2</sup>                        | 1.041                                                                             |
| <i>R</i> <sub>1</sub> [ <i>I</i> > 2σ( <i>I</i> )]  | 0.0981                                                                            |
| <i>wR</i> <sub>2</sub> [ <i>I</i> > 2σ( <i>I</i> )] | 0.1231                                                                            |

**Table S5.** Crystallographic Data and Structure Refinement Parameters of Cs<sup>+</sup>cZJU-X102.

|                   |                                                                                                   |
|-------------------|---------------------------------------------------------------------------------------------------|
| CCDC              | 2306608                                                                                           |
| empirical formula | C <sub>228</sub> H <sub>216</sub> Cs <sub>4</sub> N <sub>6</sub> O <sub>98</sub> Zr <sub>12</sub> |
| temperature/K     | 100.00                                                                                            |
| fw/(g/mol)        | 6234.33                                                                                           |
| cryst syst        | trigonal                                                                                          |

|                                            |             |
|--------------------------------------------|-------------|
| space group                                | <i>R3c</i>  |
| <i>a</i> /Å                                | 50.9885(5)  |
| <i>b</i> /Å                                | 50.9885(5)  |
| <i>c</i> /Å                                | 37.6460(4)  |
| $\alpha$ /deg                              | 90          |
| $\beta$ /deg                               | 90          |
| $\gamma$ /deg                              | 120         |
| volume/Å <sup>3</sup>                      | 84760.6(19) |
| <i>Z</i>                                   | 9           |
| $\rho_{\text{calc}}$ /(g/cm <sup>3</sup> ) | 1.099       |
| $\mu$ /mm <sup>-1</sup>                    | 6.106       |
| reflns collected                           | 194778      |
| indep reflns                               | 32606       |
| GOF on $F^2$                               | 1.011       |
| $R_1 [I > 2\sigma(I)]$                     | 0.0768      |
| $wR_2 [I > 2\sigma(I)]$                    | 0.2172      |

---

### <sup>1</sup>H NMR Spectra for Compounds

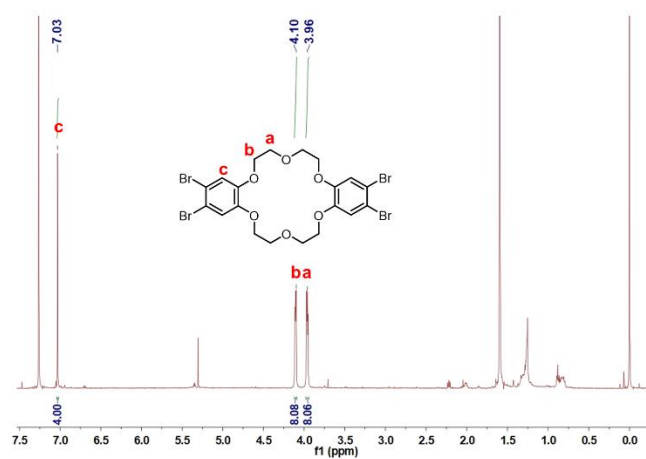

**Figure S17.** <sup>1</sup>H NMR spectrum of 4,4',5,5'-tetrabromodibenzo-18-crown-6. (500 MHz, CDCl<sub>3</sub>, 298 K)

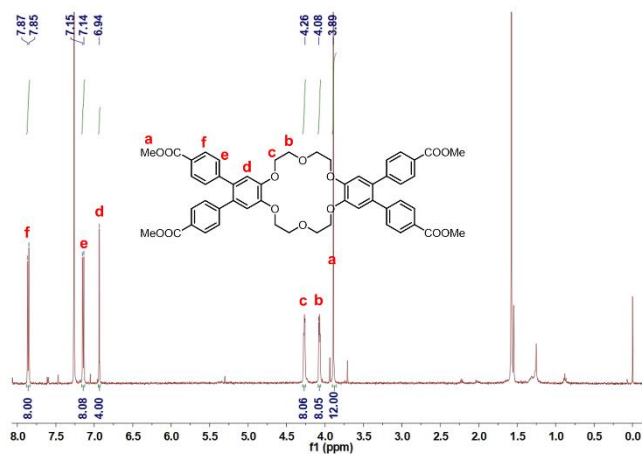

**Figure S18.** <sup>1</sup>H NMR spectrum of 4,4',5,5'-tetrabenzoate dibenzo-18-crown-6. (500 MHz, CDCl<sub>3</sub>, 298 K)

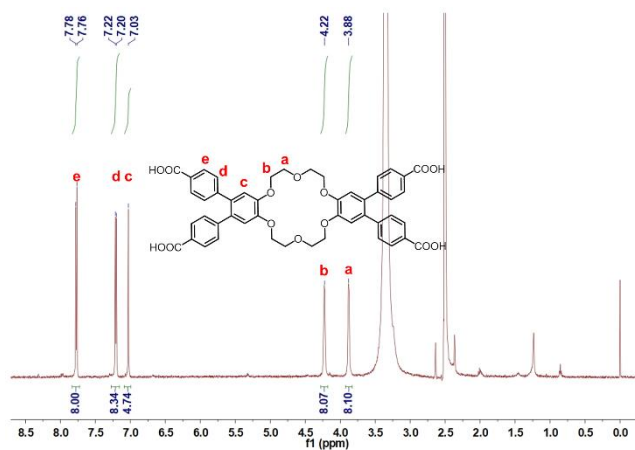

**Figure S19.** <sup>1</sup>H NMR spectrum of 4,4',5,5'-terabenzoic acid dibenzo-18-crown-6. (500 MHz, DMSO-d<sub>6</sub>, 298 K)

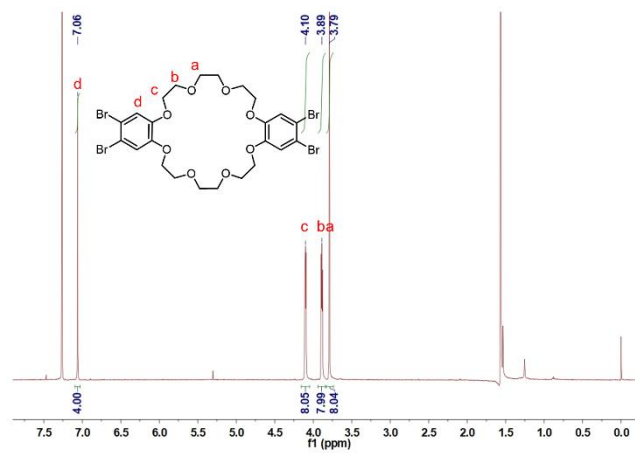

**Figure S20.** <sup>1</sup>H NMR spectrum of 4,4',5,5'-tetrabromodibenzo-24-crown-8. (500 MHz, CDCl<sub>3</sub>, 298 K)

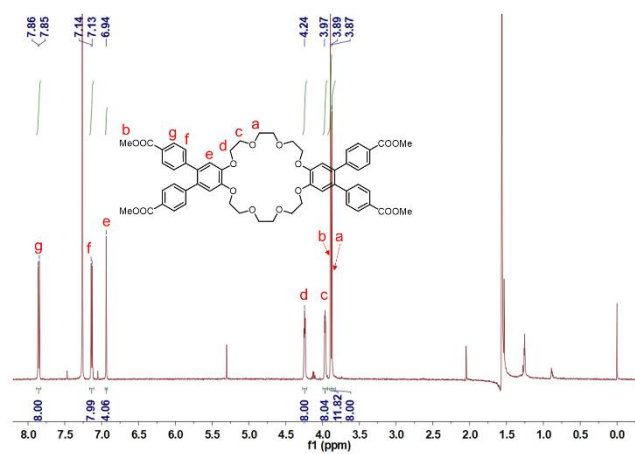

**Figure S21.** <sup>1</sup>H NMR spectrum of 4,4',5,5'-tetrabenzoate dibenzo-24-crown-8. (500 MHz, CDCl<sub>3</sub>, 298 K)

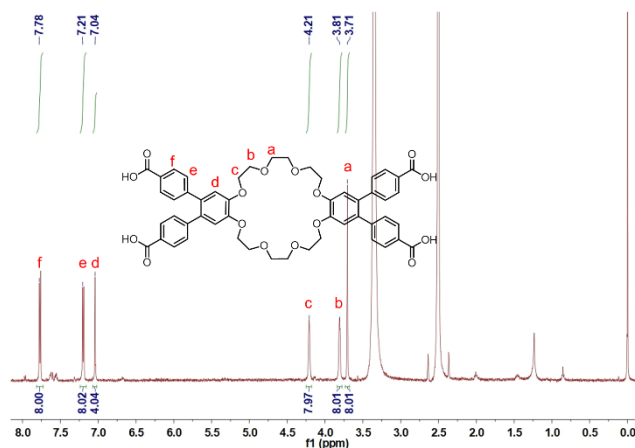

**Figure S22.** <sup>1</sup>H NMR spectrum of 4,4',5,5'-terabzoic acid dibenzo-24-crown-8. (500 MHz, DMSO-d<sub>6</sub>, 298 K)

## References

- [1] M. J. Manos, M. G. Kanatzidis, *J. Am. Chem. Soc.* **2009**, *131* (18), 6599.
- [2] T. Wen, X. Wu, M. Liu, Z. Xing, X. Wang, A.-W. Xu, *Dalton transactions* **2014**, *43* (20), 7464.
- [3] Y. Song, Y. Du, D. Lv, G. Ye, J. Wang, *J. Hazard. Mater.* **2014**, *274*, 221.
- [4] G. Ye, F. Bai, J. Wei, J. Wang, J. Chen, *J. Hazard. Mater.* **2012**, *225*, 8.
- [5] X. H. Qi, K. Z. Du, M. L. Feng, J. R. Li, C. F. Du, B. Zhang, X. Y. Huang, *J. Mater. Chem. A* **2015**, *3* (10), 5665.
- [6] Y. J. Gao, M. L. Feng, B. Zhang, Z. F. Wu, Y. Song, X. Y. Huang, *J. Mater. Chem. A* **2018**, *6* (9), 3967.
- [7] C. Guo, M. Yuan, L. He, L. Cheng, X. Wang, N. Shen, F. Ma, G. Huang, S. Wang, *CrystEngComm* **2021**, *23* (18), 3349.
- [8] L. Feng, X. Chen, M. Cao, S. Zhao, H. Wang, D. Chen, Y. Ma, T. Liu, Y. Yuan, N. Wang, *Angew. Chem. Int. Ed.* **2023**, e202312894.

- [9] J. Zhang, L. Chen, X. Dai, L. Chen, F. Zhai, W. Yu, S. Guo, L. Yang, L. Chen, Y. Zhang, *Chem. Commun.* **2021**, 57 (68), 8452.
- [10] J. L. Mertz, Z. H. Fard, C. D. Malliakas, M. J. Manos, M. G. Kanatzidis, *Chem. Mater.* **2013**, 25 (10), 2116.
- [11] E. Rathore, P. Pal, K. Biswas, *Chem. - Eur. J.* **2017**, 23 (46), 11085.
- [12] P. Amesh, A. Suneesh, K. Venkatesan, R. U. Maheswari, S. Vijayalakshmi, *Sep. Purif. Technol.* **2020**, 238, 116393.
- [13] P. Asgari, S. Mousavi, H. Aghayan, H. Ghasemi, T. Yousefi, *Microchem. J.* **2019**, 150, 104188.
- [14] Y. Wang, Z. Liu, Y. Li, Z. Bai, W. Liu, Y. Wang, X. Xu, C. Xiao, D. Sheng, J. Diwu, *J. Am. Chem. Soc.* **2015**, 137 (19), 6144.
- [15] J. Ai, F. Y. Chen, C. Y. Gao, H. R. Tian, Q. J. Pan, Z. M. Sun, *Inorg. Chem.* **2018**, 57 (8), 4419.
- [16] A. Nilchi, R. Saberi, M. Moradi, H. Azizpour, R. Zarghami, *J. Radioanal. Nucl. Chem.* **2012**, 292, 609.
